# Supplementary material for: Normalizing and Correcting Variable and Complex LC–MS Metabolomic Data with the R Package pseudoDrift
Source: MDPI journal article supplement (doi:10.3390/metabo12050435), 2022-05-12

● B1 ● B2 ● B3 ● B4

● Pseudo\_QC \* QC ● Sample

A

APIGENIN\_7\_O\_GLU raw data using B4 data to train pseudo-QC

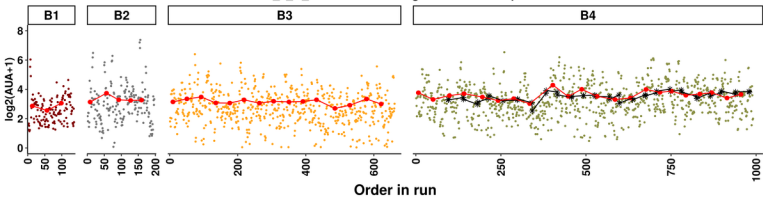

B

APIGENIN\_7\_O\_GLU signal drift corrected data

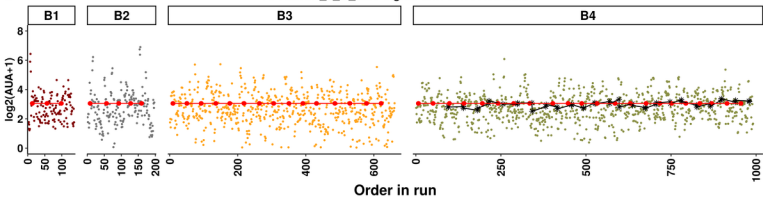

● B1 ● B2 ● B3 ● B4

● Pseudo\_QC \* QC ● Sample

**A**

APIGENIN raw data using B4 data to train pseudo-QC

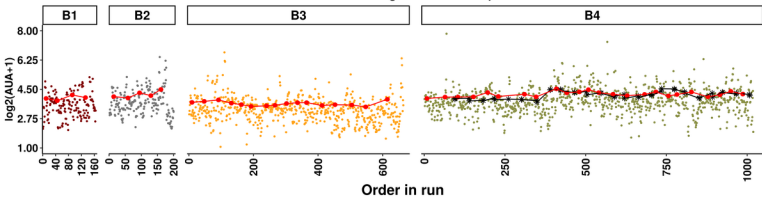

**B**

APIGENIN signal drift corrected data

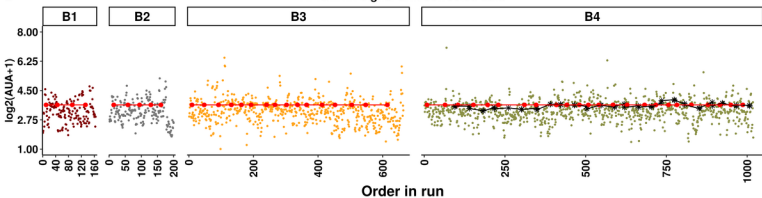

● B1 ● B2 ● B3 ● B4  
● Pseudo\_QC \* QC ● Sample

A

APIMAYSIN raw data using B4 data to train pseudo-QC

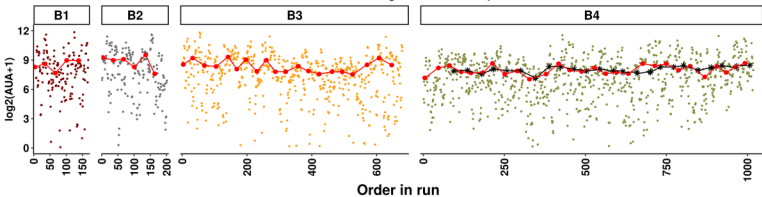

B

APIMAYSIN signal drift corrected data

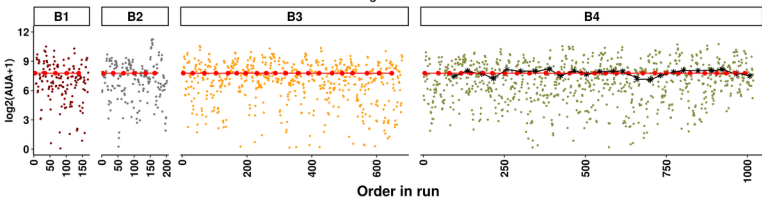

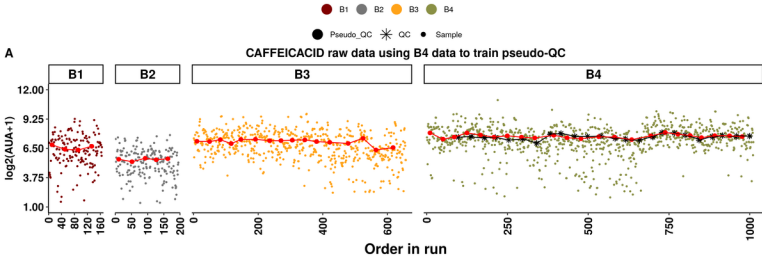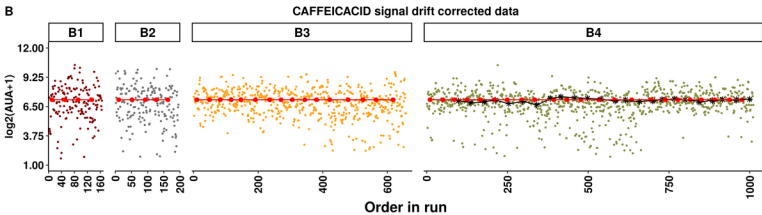

● B1 ● B2 ● B3 ● B4  
● Pseudo\_QC ✱ QC ● Sample

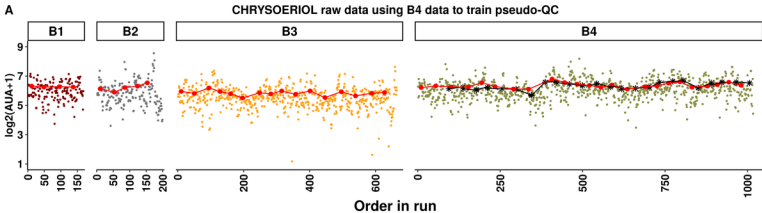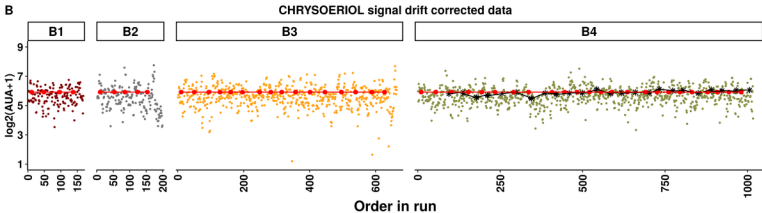

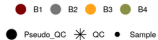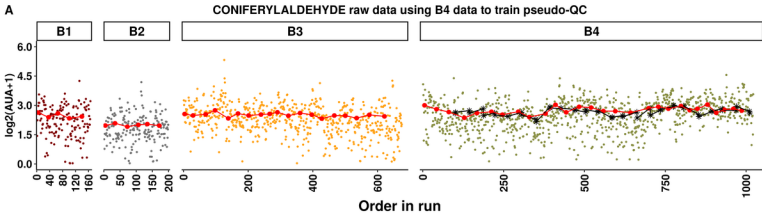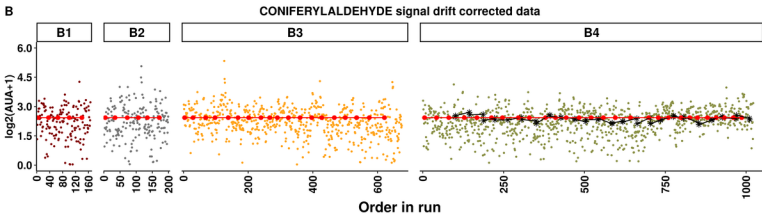

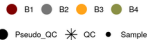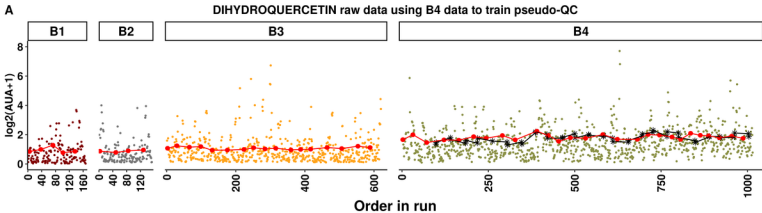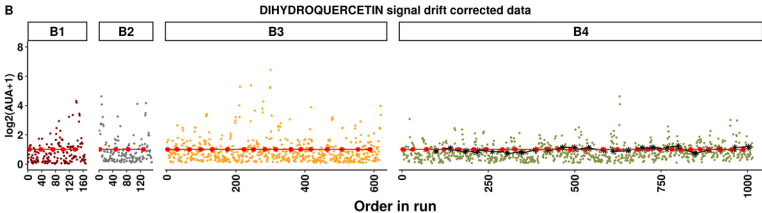

● B1 ● B2 ● B3 ● B4  
 ● Pseudo\_QC ✱ QC ● Sample

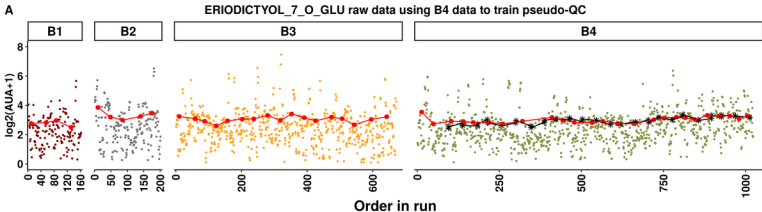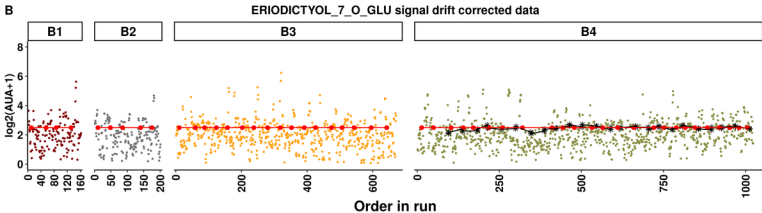



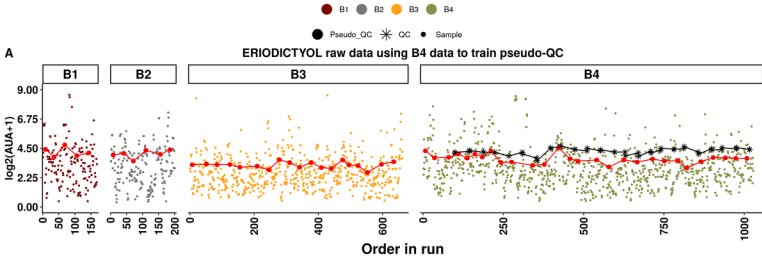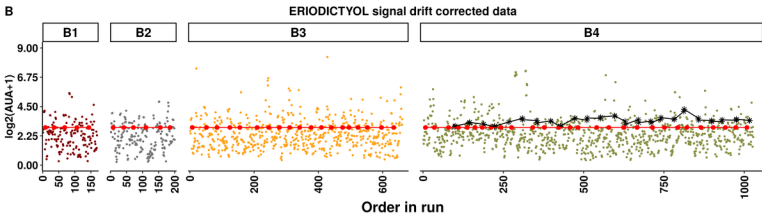

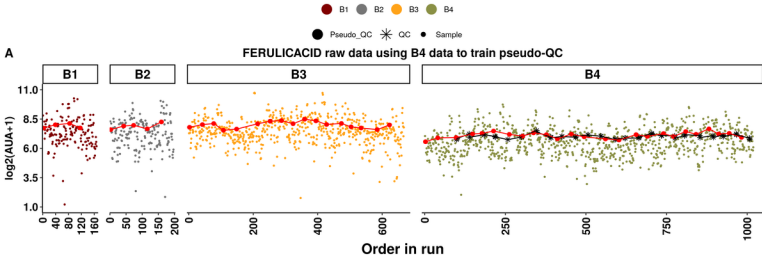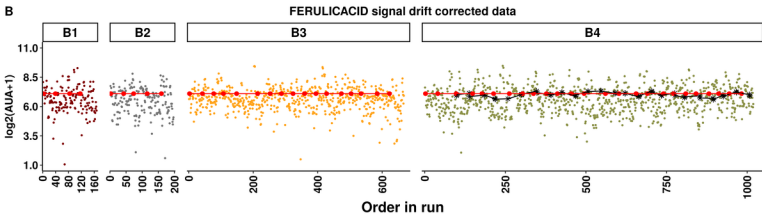

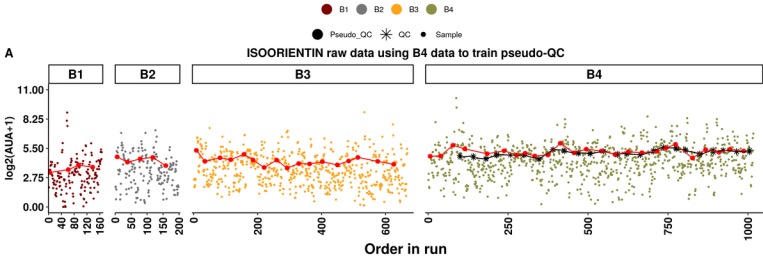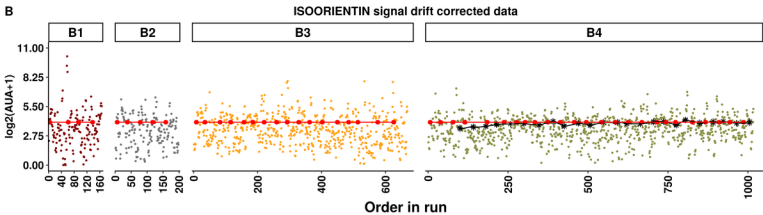

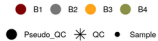

A

KAEMPFEROL raw data using B4 data to train pseudo-QC

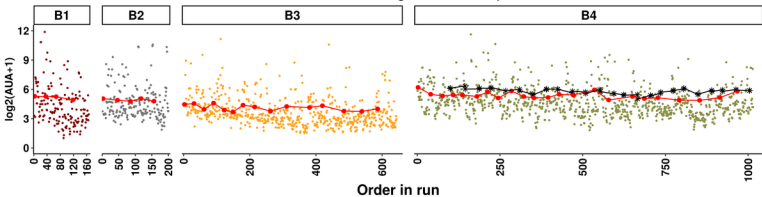

B

KAEMPFEROL signal drift corrected data

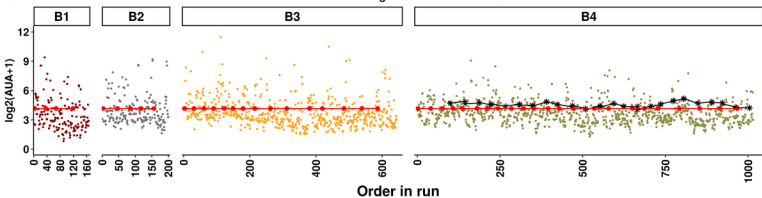

● B1 ● B2 ● B3 ● B4

● Pseudo\_QC \* QC ● Sample

A

LUTEOLIN raw data using B4 data to train pseudo-QC

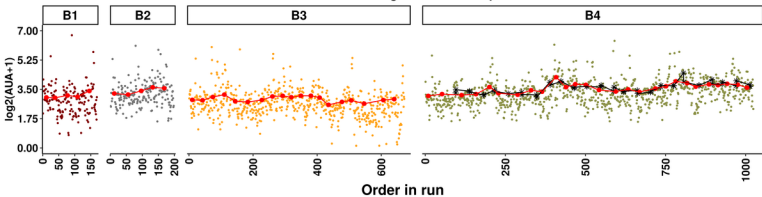

B

LUTEOLIN signal drift corrected data

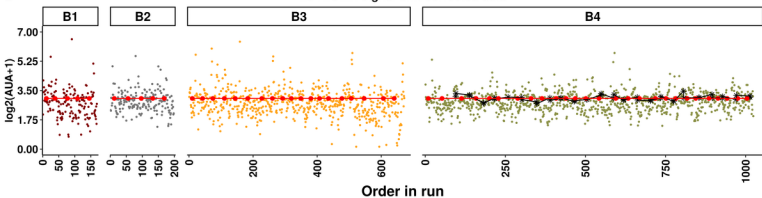

● B1 ● B2 ● B3 ● B4

● Pseudo\_QC \* QC ● Sample

**A**

MAYSIN raw data using B4 data to train pseudo-QC

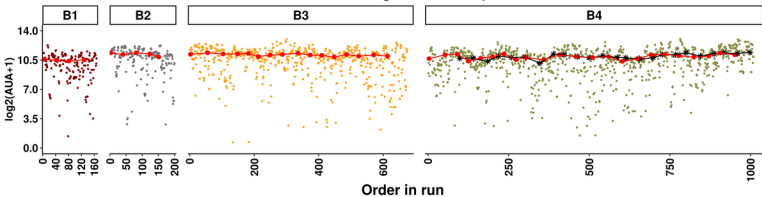

**B**

MAYSIN signal drift corrected data

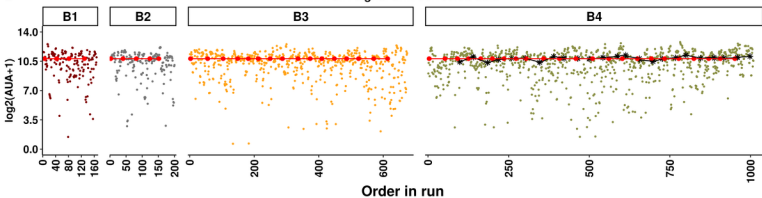

● B1 ● B2 ● B3 ● B4

● Pseudo\_QC \* QC ● Sample

A

NARINGENIN\_7\_O\_GLUCOSIDE raw data using B4 data to train pseudo-QC

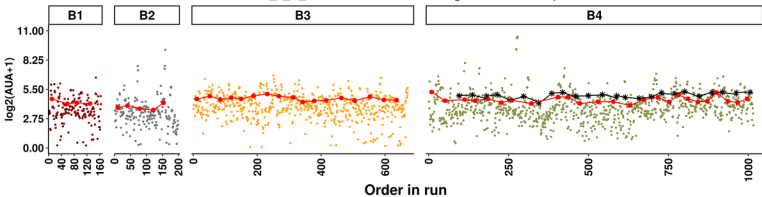

B

NARINGENIN\_7\_O\_GLUCOSIDE signal drift corrected data

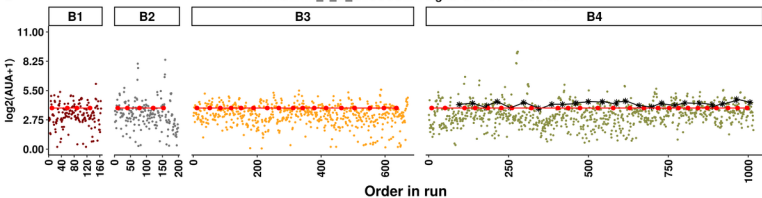

● B1 ● B2 ● B3 ● B4

● Pseudo\_QC \* QC ● Sample

A

NARINGENIN raw data using B4 data to train pseudo-QC

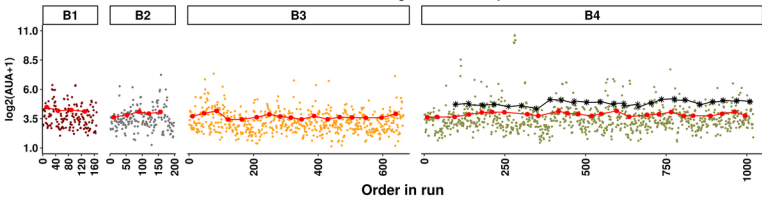

B

NARINGENIN signal drift corrected data

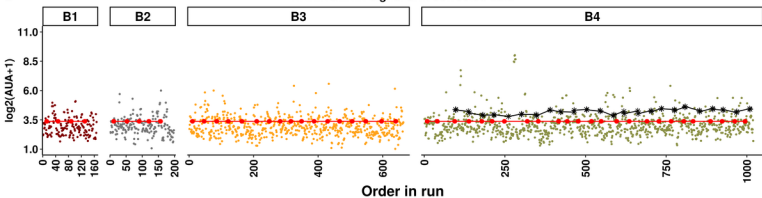



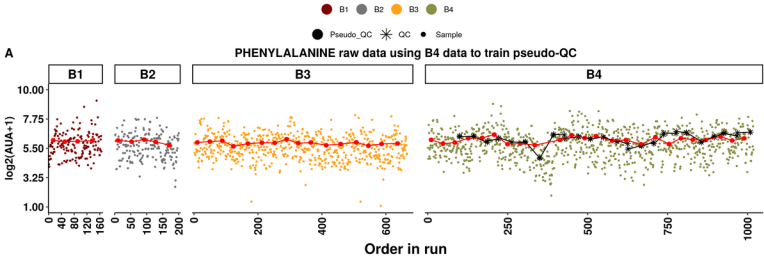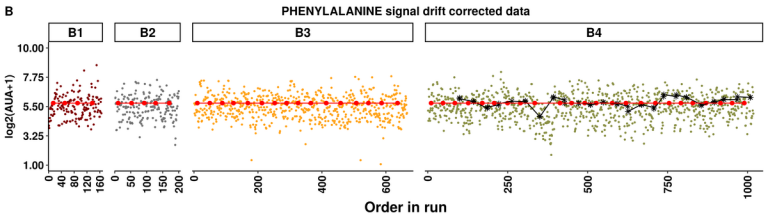

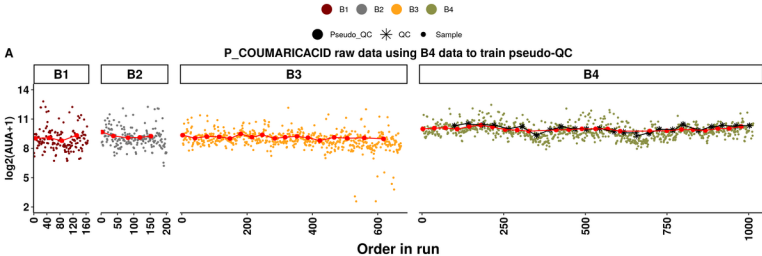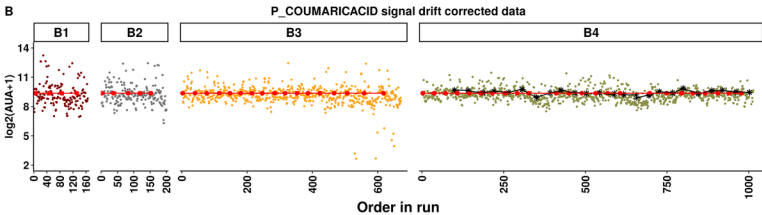

● B1 ● B2 ● B3 ● B4

● Pseudo\_QC \* QC ● Sample

A

QUERCETIN raw data using B4 data to train pseudo-QC

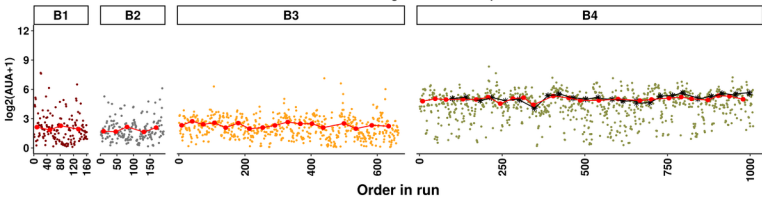

B

QUERCETIN signal drift corrected data

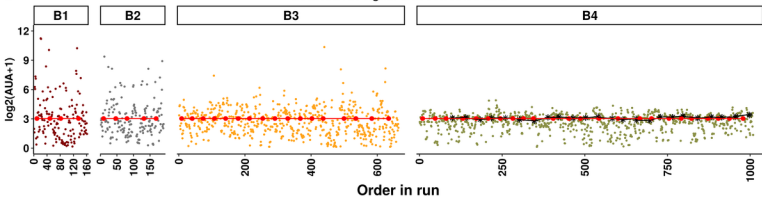

● B1 ● B2 ● B3 ● B4

● Pseudo\_QC \* QC ● Sample

A

QUINICACID raw data using B4 data to train pseudo-QC

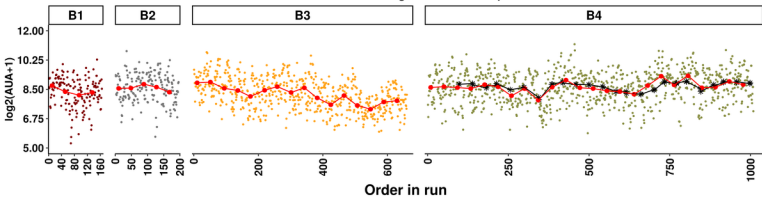

B

QUINICACID signal drift corrected data

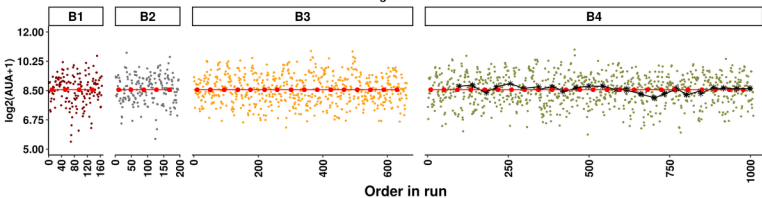

● B1 ● B2 ● B3 ● B4

● Pseudo\_QC \* QC ● Sample

A

RHAMNOSYLISOORIENTIN raw data using B4 data to train pseudo-QC

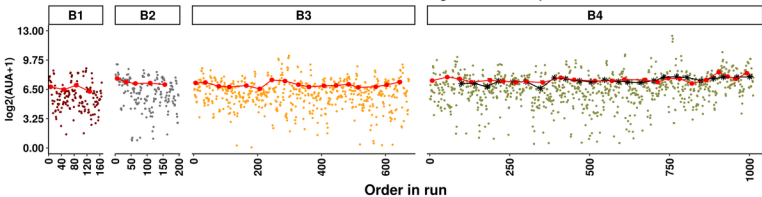

B

RHAMNOSYLISOORIENTIN signal drift corrected data

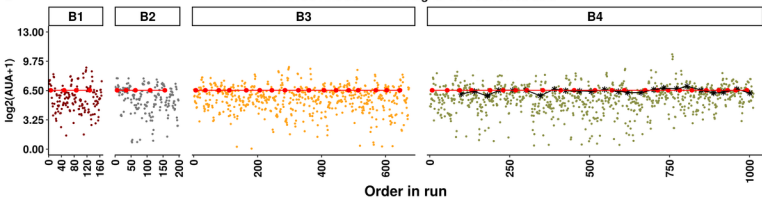

● B1 ● B2 ● B3 ● B4

● Pseudo\_QC \* QC ● Sample

A

SHIKIMICACID raw data using B4 data to train pseudo-QC

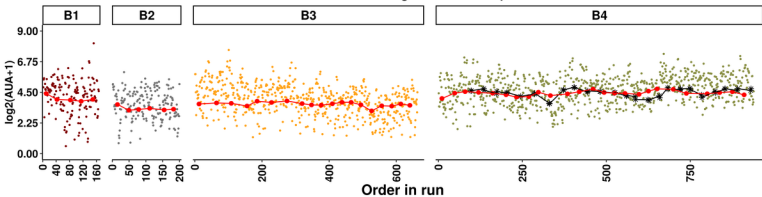

B

SHIKIMICACID signal drift corrected data

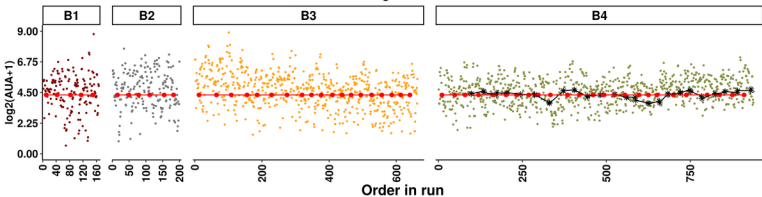

● B1 ● B2 ● B3 ● B4

● Pseudo\_QC \* QC ● Sample

A

SINAPICACID raw data using B4 data to train pseudo-QC

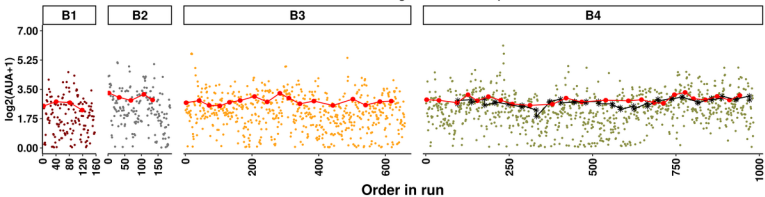

B

SINAPICACID signal drift corrected data

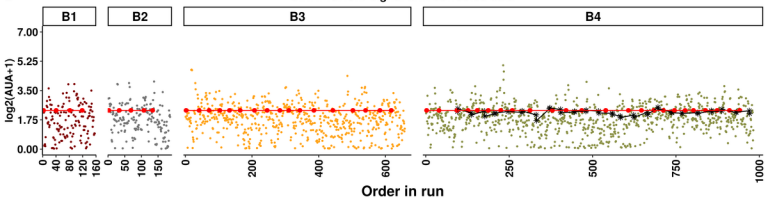

● B1 ● B2 ● B3 ● B4

● Pseudo\_QC \* QC ● Sample

A

TRICIN raw data using B4 data to train pseudo-QC

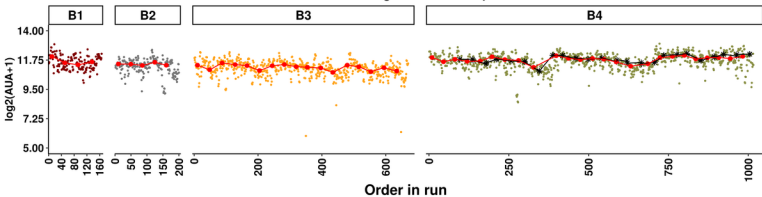

B

TRICIN signal drift corrected data

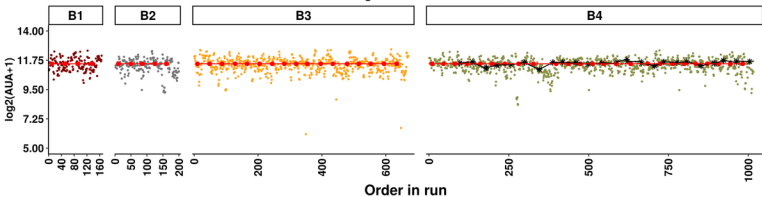



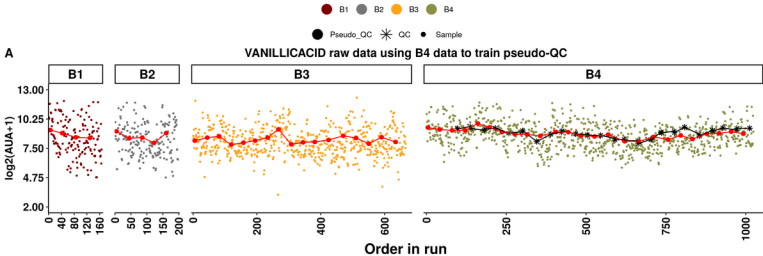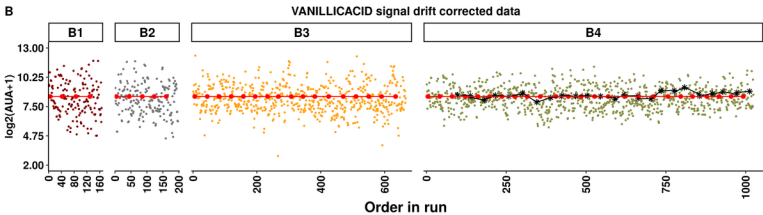

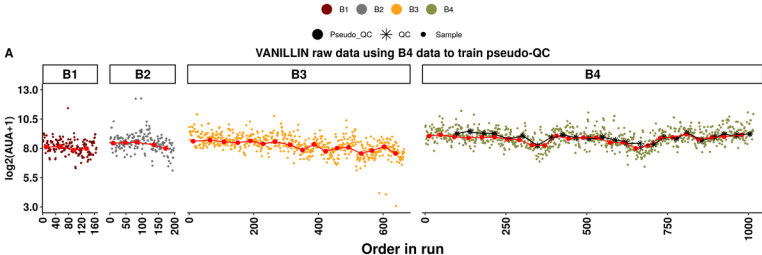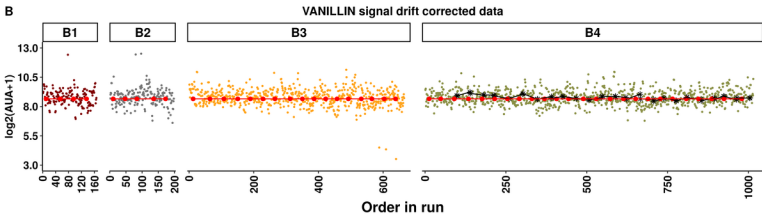

● B1 ● B2 ● B3 ● B4

● Pseudo\_QC \* QC ● Sample

A

VITEXIN raw data using B4 data to train pseudo-QC

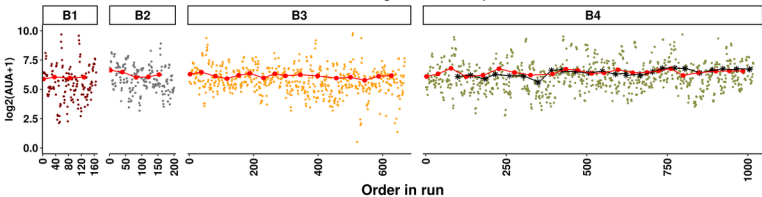

B

VITEXIN signal drift corrected data

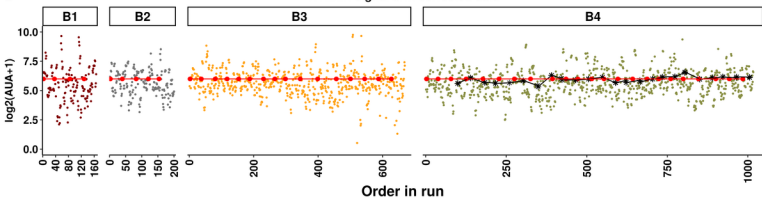

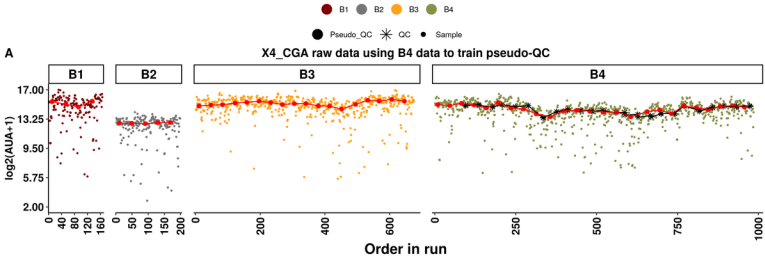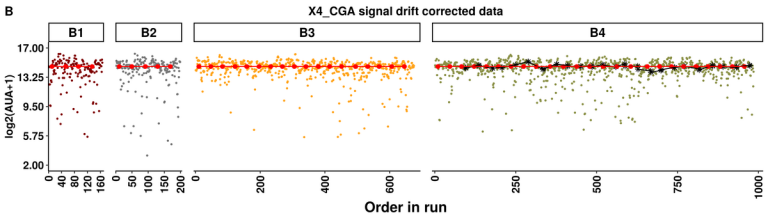

Supplement: s1 [file s1]
